# Supplementary material for: MELK predicts poor prognosis and promotes metastasis in esophageal squamous cell carcinoma via activating the NF-κB pathway
Source: PubMed Central journal article supplement — Int J Oncol. 2022 Jun 21;61(2):94. doi: 10.3892/ijo.2022.5384 (PMC9256079; doi:10.3892/ijo.2022.5384), 2022-06-21

Figure S1. Negative control section without primary MELK antibody. MELK, maternal embryonic leucine zipper kinase.

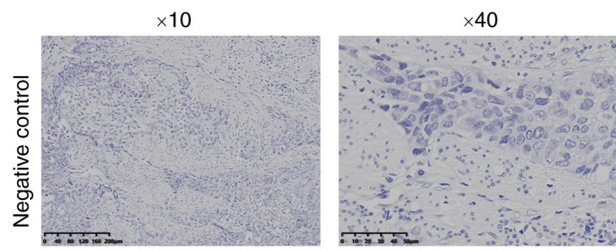

Figure S2. (A) GSEA plot showing that MELK expression was positively correlated with NF- $\kappa$ B-activated gene signature. (B) Western blot analysis of  $\beta$ -catenin, p-SMAD2 and p-AKT in ESCC cells with MELK knockdown. GSEA, gene set enrichment analysis; MELK, maternal embryonic leucine zipper kinase; NES, normalized enrichment score; sh, short hairpin RNA; NC, negative control; p-, phosphorylated.

A

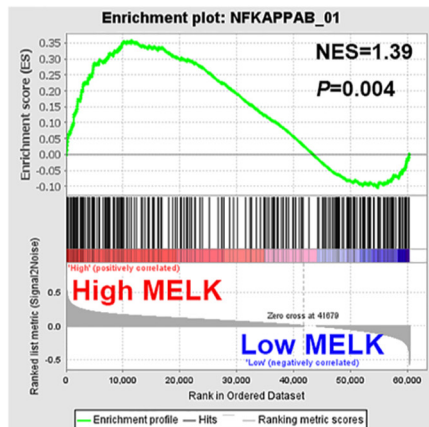

B

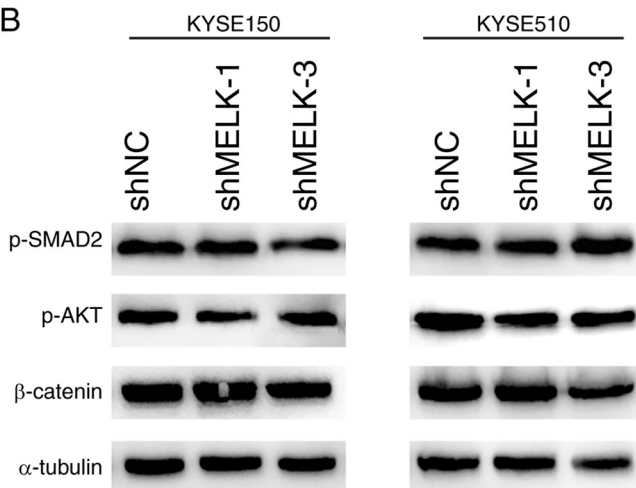

Supplement: Supplementary_Data.pdf [file Supplementary_Data.pdf]
